# Supplementary material for: The Photoperiod Stress Response in Arabidopsis thaliana Depends on Auxin Acting as an Antagonist to the Protectant Cytokinin
Source: MDPI journal article supplement (doi:10.3390/ijms23062936), 2022-03-08
Supplement: s1 [file s1]

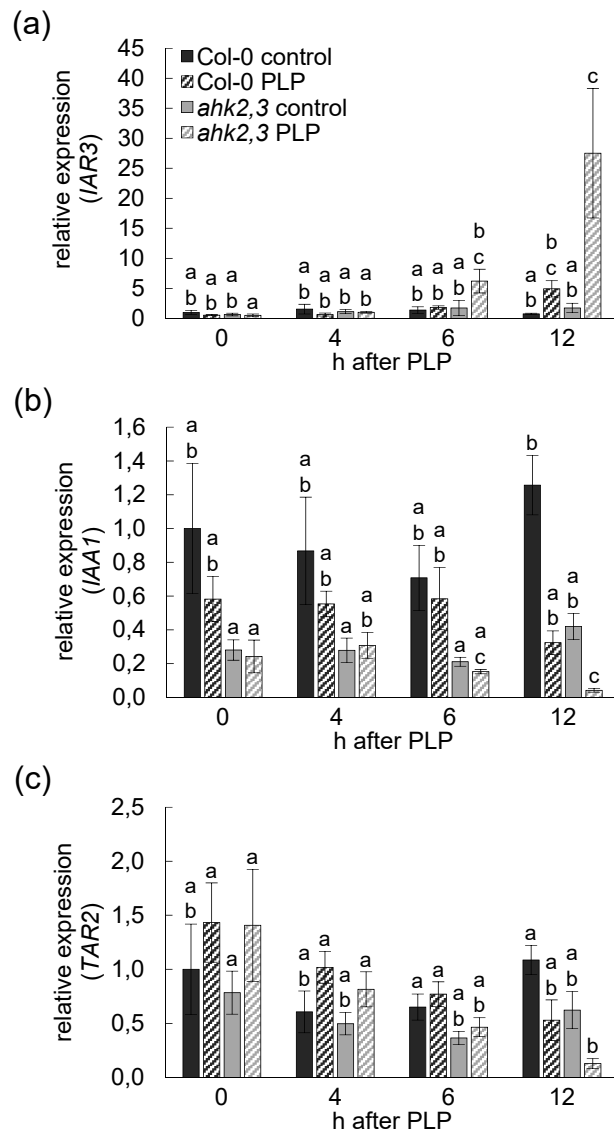

**Supplemental Figure S1.** qRT-PCR analysis of photoperiod stress-responsive auxin-related genes identified via RNA-seq. Transcript abundance of *IAR3* (a), *IAA1* (b) and *TAR2* (c) in wild type and *ahk2,3* 0, 4, 6 and 12 h after the PLP-treatment compared to respective control plants. The expression level of wild-type control at the end of the PLP treatment (0 h) was set to 1. Letters indicate significantly different statistical groups (one-way ANOVA;  $p \leq 0.05$ ;  $n \geq 3$ ). Error bars indicate SE. A schematic overview of the experimental setup can be found in Figure 1a.

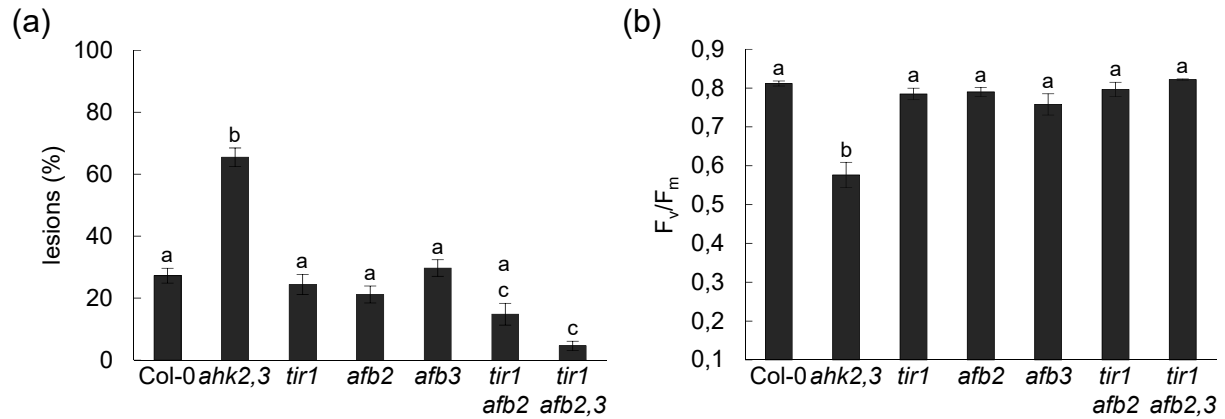

**Supplemental Figure S2.** Auxin receptors TIR1, AFB2 and AFB3 mediate the photoperiod stress sensitivity redundantly. (a) Lesion formation of leaves in five-week-old Col-0, *ahk2,3*, *tir1*, *afb2*, *afb3*, *tir1afb2* and *tir1afb2,3* plants the day after the PCD-inducing night (one-way ANOVA;  $p \leq 0.05$ ;  $n \geq 12$ ). (b) Efficiency of photosystem II ( $F_v/F_m$ ) of leaves the day after the photoperiod stress treatment (Paired Wilcoxon test, FDR corrected via Benjamini-Hochberg test;  $p \leq 0.05$ ;  $n = 15$ ). Letters indicate significantly different statistical groups. Error bars indicate SE. Pictures of representative plants exposed to a 24-h prolongation of the light period are shown in Supplemental Figure S4c.

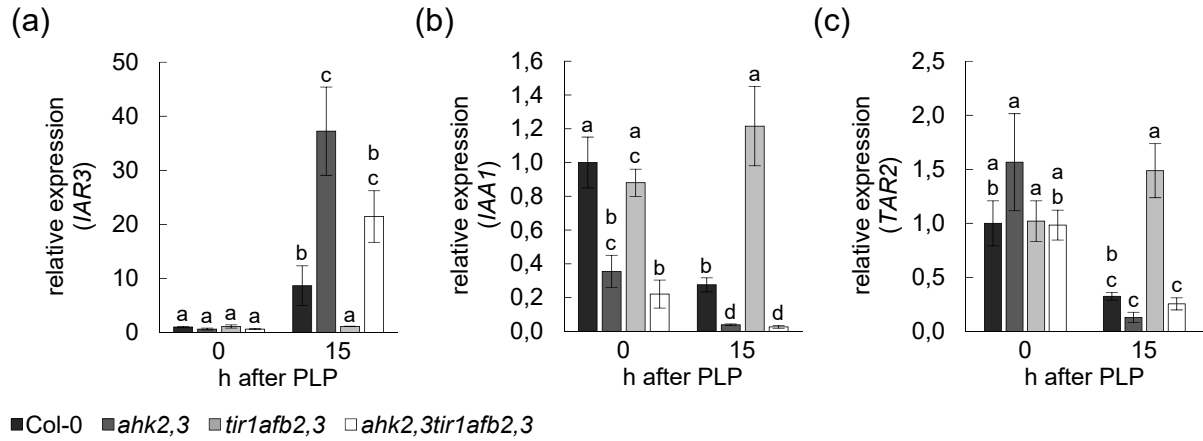

**Supplemental Figure S3.** Expression analysis of photoperiod stress-responsive auxin-related genes. Transcript abundance of *IAR3* (a), *IAA1* (b) and *TAR2* (c) 0 and 15 h after the PLP compared to respective control plants (same experimental setup as in Figure 5). The expression level of wild type at the end of the PLP treatment (0 h) was set to 1 (one-way ANOVA;  $p \leq 0.05$ ;  $n \geq 3$ ). Letters indicate significantly different statistical groups.

(a)

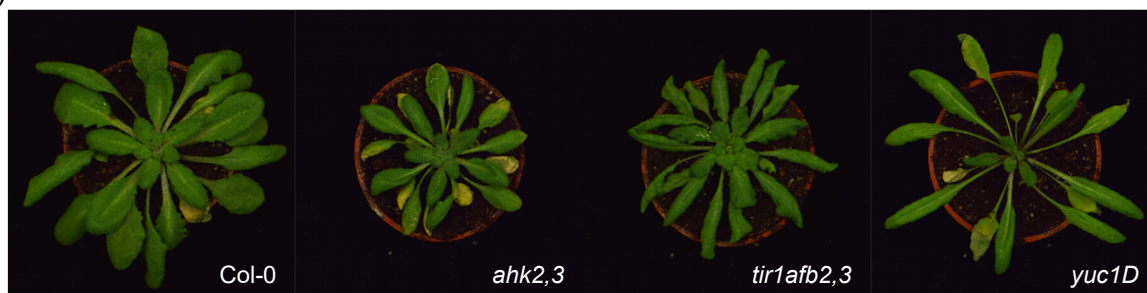

(b)

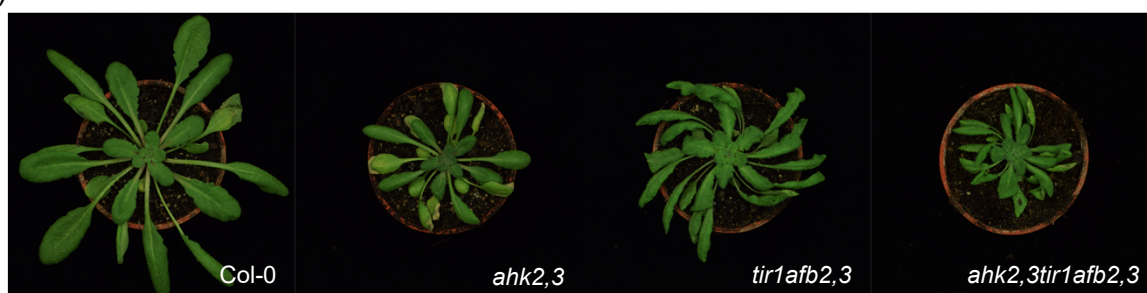

(c)

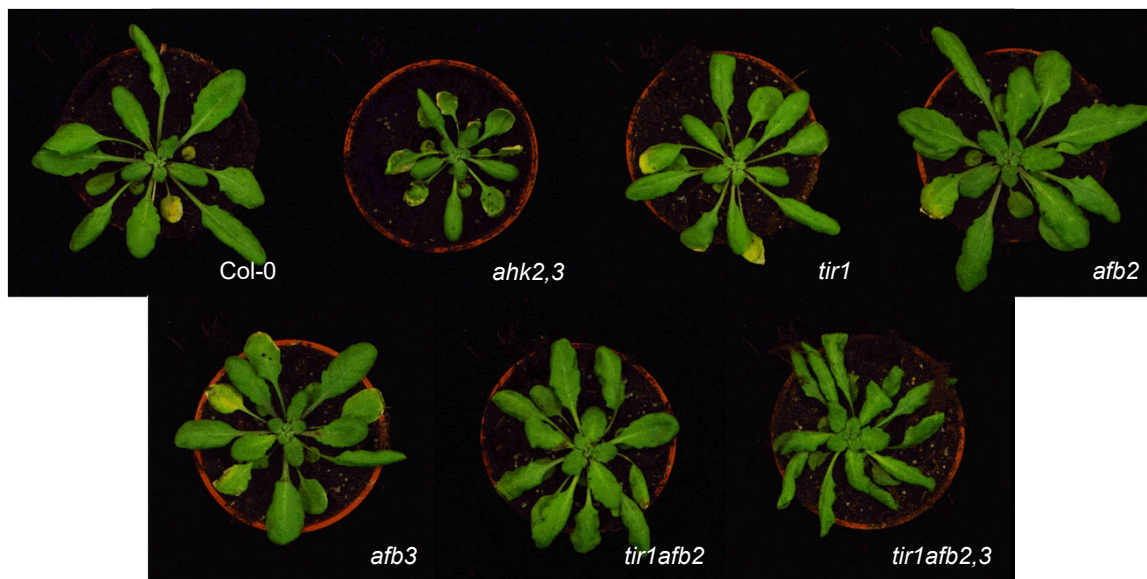

**Supplemental Figure S4.** Pictures of representative plants from experiments shown in this study. The plants were used for the experiments depicted in Figure 4 (a), Figure 5 (b) and Supplemental Figure S2 (c).

**Supplemental Table S1.** Overview over log<sub>2</sub>-fold changes of transcript abundance corresponding to plots depicted in Figure 1. Bold numbers indicate a significant difference between compared genotypes/conditions ( $p \leq 0.05$ ;  $n = 3$ ). Data have been extracted from [33]. PLP, prolonged light period.

|               | <i>ahk2,3</i> control<br>vs. WT control |              |              |              | WT PLP<br>vs. WT control |       |              |              | <i>ahk2,3</i> PLP<br>vs. <i>ahk2,3</i> control |              |              |              | <i>ahk2,3</i> PLP<br>vs. WT PLP |              |             |              |
|---------------|-----------------------------------------|--------------|--------------|--------------|--------------------------|-------|--------------|--------------|------------------------------------------------|--------------|--------------|--------------|---------------------------------|--------------|-------------|--------------|
|               | 0                                       | 4            | 6            | 12           | 0                        | 4     | 6            | 12           | 0                                              | 4            | 6            | 12           | 0                               | 4            | 6           | 12           |
| <i>TAA1</i>   | <b>-1.17</b>                            | <b>-1.19</b> | <b>-1.89</b> | <b>-2.32</b> | -0.53                    | -0.69 | <b>-1.51</b> | -0.85        | -1.05                                          | <b>-1.63</b> | -0.84        | -5.00        | <b>-1.68</b>                    | <b>-2.13</b> | -1.22       | <b>-6.47</b> |
| <i>TAR1</i>   | -0.02                                   | 0.02         | 0.03         | 0.89         | 0.09                     | 0.12  | 0.30         | 2.87         | 0.08                                           | 1.20         | 2.44         | 3.65         | -0.03                           | 1.10         | 2.17        | 1.68         |
| <i>TAR2</i>   | 0.20                                    | -0.49        | -0.52        | -0.45        | 0.98                     | 0.86  | 0.68         | -1.09        | 1.01                                           | 0.84         | -0.16        | <b>-3.80</b> | 0.23                            | -0.50        | -1.36       | <b>-3.15</b> |
| <i>YUC1</i>   | -0.02                                   | 0.02         | -0.94        | -0.07        | 0.09                     | -0.84 | -0.66        | 0.02         | 0.08                                           | -0.72        | 2.30         | 1.56         | -0.03                           | 0.14         | 2.02        | 1.47         |
| <i>YUC2</i>   | -1.53                                   | -1.37        | -0.71        | -0.81        | -0.43                    | -0.06 | 0.29         | -0.42        | 0.98                                           | 0.76         | -1.51        | -5.11        | -0.12                           | -0.56        | -2.51       | -5.49        |
| <i>YUC3</i>   | 1.82                                    | 0.94         | 2.46         | -0.07        | 0.09                     | -0.84 | 0.30         | -0.94        | -1.77                                          | -1.64        | -0.93        | 1.33         | -0.03                           | 0.14         | 1.23        | 2.20         |
| <i>YUC4</i>   | -0.73                                   | -0.76        | -1.65        | -1.54        | -1.61                    | -1.47 | -2.71        | -0.61        | -1.33                                          | -0.58        | -0.20        | -0.13        | -0.45                           | 0.13         | 0.86        | -1.06        |
| <i>YUC5</i>   | -0.02                                   | -0.56        | -0.87        | 1.28         | 2.99                     | 0.53  | 1.64         | 0.04         | 2.30                                           | 3.89         | 5.16         | -2.62        | -0.72                           | 2.79         | 2.65        | -1.38        |
| <i>YUC6</i>   | 0.32                                    | 0.22         | 0.14         | 0.45         | -0.51                    | -0.73 | <b>-2.23</b> | <b>-1.43</b> | -0.40                                          | <b>-1.73</b> | <b>-3.83</b> | <b>-3.99</b> | 0.42                            | -0.77        | -1.46       | -2.11        |
| <i>YUC7</i>   | -0.02                                   | 0.98         | -0.94        | 1.79         | 2.53                     | 2.03  | 0.30         | 0.02         | 0.08                                           | 0.24         | 1.50         | 0.52         | -2.47                           | -0.81        | 0.26        | 2.29         |
| <i>YUC8</i>   | -2.08                                   | -2.24        | -1.68        | -1.19        | -0.86                    | 0.64  | 1.10         | 2.18         | 0.32                                           | 2.18         | 2.12         | <b>2.84</b>  | -0.89                           | -0.69        | -0.66       | -0.52        |
| <i>YUC9</i>   | -2.54                                   | -0.51        | -0.23        | -0.63        | -1.31                    | 0.47  | 1.10         | 1.30         | 0.20                                           | 1.99         | -0.69        | -2.99        | -1.03                           | 1.01         | -2.02       | <b>-4.92</b> |
| <i>YUC10</i>  | -0.02                                   | 0.02         | -0.94        | -0.07        | 0.09                     | 0.12  | -0.66        | 0.98         | 0.08                                           | 0.24         | 0.54         | 1.56         | -0.03                           | 0.14         | 0.26        | 0.51         |
| <i>YUC11</i>  | -0.02                                   | 0.02         | 0.03         | -0.07        | 0.09                     | 1.08  | 0.30         | 0.98         | 0.08                                           | 0.24         | 0.54         | 1.56         | -0.03                           | -0.82        | 0.26        | 0.51         |
| <i>DAO1</i>   | -0.10                                   | 0.00         | -0.27        | -0.05        | 0.15                     | -0.03 | 0.10         | 0.76         | 0.16                                           | -0.44        | 0.94         | <b>2.13</b>  | -0.09                           | -0.42        | 0.56        | <b>1.32</b>  |
| <i>DAO2</i>   | -0.02                                   | -2.14        | 0.03         | -0.07        | 0.58                     | -1.10 | 1.82         | 0.02         | 0.56                                           | 1.22         | 1.41         | 4.91         | -0.04                           | 0.17         | -0.39       | 4.82         |
| <i>IAR3</i>   | 0.00                                    | -0.52        | -0.35        | 0.92         | 0.18                     | -0.05 | 1.45         | <b>3.52</b>  | 0.16                                           | 1.41         | <b>4.00</b>  | <b>4.83</b>  | -0.02                           | 0.94         | <b>2.21</b> | <b>2.23</b>  |
| <i>ILR1</i>   | -0.09                                   | -0.03        | 0.04         | -0.13        | -0.12                    | -0.35 | -0.38        | 0.79         | -0.19                                          | -0.26        | 0.77         | <b>2.96</b>  | -0.16                           | 0.06         | 1.20        | <b>2.04</b>  |
| <i>ILL1</i>   | 0.01                                    | 0.07         | 0.06         | -0.06        | -0.03                    | -0.21 | -0.46        | <b>-0.59</b> | -0.06                                          | -0.39        | -0.69        | <b>-1.70</b> | -0.01                           | -0.11        | -0.17       | <b>-1.18</b> |
| <i>ILL2</i>   | -0.28                                   | 0.12         | 0.13         | -0.10        | -0.07                    | 0.06  | -0.03        | -0.06        | 0.21                                           | -0.06        | -0.56        | <b>-1.01</b> | 0.00                            | 0.00         | -0.39       | <b>-1.05</b> |
| <i>GH3.1</i>  | 1.81                                    | 0.98         | -0.94        | 0.89         | 2.53                     | 1.08  | 1.80         | 2.91         | 1.69                                           | 0.24         | 3.40         | 2.43         | 0.97                            | 0.14         | 0.66        | 0.41         |
| <i>GH3.2</i>  | -3.35                                   | -0.27        | 0.51         | 3.37         | -0.77                    | 2.28  | <b>5.08</b>  | <b>9.02</b>  | 2.52                                           | 3.38         | <b>6.11</b>  | <b>6.06</b>  | -0.07                           | 0.83         | 1.54        | 0.41         |
| <i>GH3.3</i>  | -2.17                                   | -1.64        | -1.86        | -1.82        | 0.12                     | 1.00  | 1.67         | <b>6.17</b>  | 1.82                                           | <b>3.72</b>  | <b>3.28</b>  | <b>5.53</b>  | -0.47                           | 1.09         | -0.26       | -2.46        |
| <i>GH3.4</i>  | -0.99                                   | 0.02         | 0.03         | -0.07        | -0.87                    | 0.12  | 0.30         | 0.98         | 1.04                                           | 0.24         | 0.54         | 2.47         | 0.93                            | 0.14         | 0.26        | 1.42         |
| <i>GH3.5</i>  | -0.39                                   | 0.40         | 1.02         | 0.76         | -1.06                    | 0.28  | 2.22         | <b>5.42</b>  | 1.28                                           | 1.43         | 1.43         | 2.24         | 1.95                            | 1.55         | 0.22        | -2.42        |
| <i>GH3.6</i>  | -0.30                                   | -1.40        | -0.01        | -0.36        | 0.60                     | 0.46  | 1.38         | 1.14         | 0.15                                           | 0.84         | 1.86         | <b>2.57</b>  | -0.75                           | -1.02        | 0.47        | 1.07         |
| <i>GH3.9</i>  | -0.10                                   | -0.54        | 0.42         | -0.09        | 0.80                     | 0.96  | 0.88         | -0.07        | 1.44                                           | 1.56         | -0.46        | -1.92        | 0.54                            | 0.06         | -0.91       | -1.94        |
| <i>GH3.17</i> | 1.12                                    | 0.84         | 1.60         | 1.18         | 0.40                     | 0.49  | -0.64        | -0.03        | 0.32                                           | -0.74        | <b>-2.48</b> | -1.59        | 1.04                            | -0.39        | -0.24       | -0.37        |

**Supplemental Table S2.** Overview over log<sub>2</sub>-fold changes of transcript abundance corresponding to plots depicted in Figure 2. Bold numbers indicate a significant difference between compared genotypes/conditions ( $p \leq 0.05$ ;  $n = 3$ ). Data have been extracted from [33]. PLP, prolonged light period.

|              | <i>ahk2,3</i> control<br>vs. WT control |       |       |       | WT PLP<br>vs. WT control |             |              |              | <i>ahk2,3</i> PLP<br>vs. <i>ahk2,3</i> control |              |              |              | <i>ahk2,3</i> PLP<br>vs. WT PLP |              |              |              |
|--------------|-----------------------------------------|-------|-------|-------|--------------------------|-------------|--------------|--------------|------------------------------------------------|--------------|--------------|--------------|---------------------------------|--------------|--------------|--------------|
|              | 0                                       | 4     | 6     | 12    | 0                        | 4           | 6            | 12           | 0                                              | 4            | 6            | 12           | 0                               | 4            | 6            | 12           |
| <i>TIR1</i>  | 0.16                                    | 0.27  | 0.47  | 0.00  | 0.36                     | -0.34       | -0.56        | -0.98        | 0.42                                           | <b>-1.28</b> | <b>-2.01</b> | <b>-2.84</b> | 0.22                            | -0.66        | <b>-0.98</b> | <b>-1.86</b> |
| <i>AFB1</i>  | -0.09                                   | 0.08  | 0.45  | 0.33  | -0.02                    | 0.40        | -0.09        | 0.08         | 0.53                                           | -0.17        | -1.60        | <b>-2.63</b> | 0.46                            | -0.48        | -1.06        | <b>-2.38</b> |
| <i>AFB2</i>  | 0.04                                    | 0.27  | 0.17  | 0.19  | -0.38                    | -0.14       | -0.24        | -0.12        | -0.14                                          | -0.48        | -0.34        | 0.14         | 0.28                            | -0.07        | 0.07         | 0.45         |
| <i>AFB3</i>  | 0.20                                    | 0.14  | 0.01  | -0.31 | 0.44                     | -0.14       | -0.60        | -0.51        | 0.36                                           | <b>-0.93</b> | <b>-1.28</b> | <b>-1.54</b> | 0.12                            | -0.65        | -0.67        | <b>-1.33</b> |
| <i>AFB4</i>  | 0.00                                    | 0.10  | 0.05  | 0.02  | 0.03                     | 0.44        | 0.74         | 0.19         | 0.22                                           | 0.71         | 0.79         | -0.01        | 0.19                            | 0.37         | 0.09         | -0.19        |
| <i>AFB5</i>  | 0.17                                    | 0.16  | 0.13  | -0.07 | 0.10                     | -0.46       | -1.00        | -1.17        | 0.05                                           | <b>-1.13</b> | <b>-2.07</b> | <b>-2.80</b> | 0.12                            | -0.51        | <b>-0.94</b> | <b>-1.70</b> |
| <i>IAA1</i>  | -0.99                                   | -0.79 | -0.70 | -0.87 | 0.46                     | 0.48        | 0.39         | 0.06         | 0.28                                           | 0.03         | <b>-2.04</b> | <b>-2.17</b> | -1.17                           | -1.23        | <b>-3.14</b> | <b>-3.09</b> |
| <i>IAA2</i>  | -0.63                                   | -0.20 | 0.22  | 0.19  | 0.38                     | 0.92        | 1.58         | 1.09         | 0.82                                           | <b>2.25</b>  | <b>1.89</b>  | 0.86         | -0.19                           | <b>1.13</b>  | 0.53         | -0.04        |
| <i>IAA3</i>  | 0.08                                    | -0.62 | -0.30 | -0.26 | -0.46                    | -0.13       | -0.72        | -0.71        | -0.71                                          | -0.13        | <b>-1.76</b> | <b>-3.26</b> | -0.17                           | -0.62        | -1.34        | <b>-2.82</b> |
| <i>IAA4</i>  | -0.16                                   | -0.19 | 0.04  | -0.06 | 0.05                     | -0.08       | -0.67        | -0.98        | 0.27                                           | -1.22        | <b>-2.94</b> | <b>-4.30</b> | 0.06                            | -1.34        | <b>-2.23</b> | <b>-3.37</b> |
| <i>IAA5</i>  | -2.17                                   | -2.93 | -1.53 | -2.05 | 0.46                     | 0.54        | 0.20         | -0.31        | 0.87                                           | 1.31         | -2.29        | -4.72        | -1.76                           | -2.16        | -4.01        | <b>-6.46</b> |
| <i>IAA6</i>  | -0.05                                   | -0.74 | -0.44 | -0.39 | 0.41                     | 0.08        | -0.23        | 0.01         | -0.31                                          | 0.30         | -1.86        | -3.12        | -0.77                           | -0.52        | -2.07        | -3.51        |
| <i>IAA7</i>  | NA                                      | NA    | NA    | NA    | NA                       | NA          | NA           | NA           | NA                                             | NA           | NA           | NA           | NA                              | NA           | NA           | NA           |
| <i>IAA8</i>  | 0.05                                    | 0.06  | 0.06  | -0.25 | 0.13                     | 0.01        | -0.01        | <b>-1.01</b> | 0.09                                           | -0.35        | <b>-0.75</b> | <b>-2.78</b> | 0.01                            | -0.30        | <b>-0.67</b> | <b>-2.02</b> |
| <i>IAA9</i>  | -0.07                                   | -0.05 | 0.15  | 0.27  | -0.09                    | <b>0.45</b> | 0.23         | 0.15         | -0.07                                          | <b>0.65</b>  | -0.07        | <b>-0.65</b> | -0.05                           | 0.15         | -0.15        | <b>-0.52</b> |
| <i>IAA10</i> | -0.05                                   | 0.35  | 0.19  | 1.03  | -0.11                    | 1.27        | <b>1.85</b>  | <b>2.29</b>  | 0.09                                           | <b>1.81</b>  | <b>3.56</b>  | <b>3.31</b>  | 0.15                            | 0.89         | <b>1.89</b>  | <b>2.05</b>  |
| <i>IAA11</i> | 0.09                                    | 0.03  | 0.13  | -0.11 | -0.07                    | -0.06       | -0.29        | -0.45        | -0.05                                          | -0.38        | <b>-1.14</b> | <b>-2.14</b> | 0.11                            | -0.30        | -0.71        | <b>-1.80</b> |
| <i>IAA12</i> | 0.19                                    | 0.39  | 0.17  | -0.01 | 0.31                     | 0.27        | -0.60        | <b>-1.40</b> | 0.02                                           | -0.65        | <b>-2.04</b> | <b>-3.96</b> | -0.10                           | -0.53        | <b>-1.28</b> | <b>-2.57</b> |
| <i>IAA13</i> | -0.20                                   | 0.09  | 0.15  | 0.22  | -0.28                    | 0.05        | -0.73        | -0.40        | -0.04                                          | -0.31        | <b>-1.68</b> | <b>-1.33</b> | 0.05                            | -0.26        | -0.81        | -0.71        |
| <i>IAA14</i> | -1.00                                   | -0.03 | -0.06 | -0.32 | 0.08                     | 0.19        | -0.92        | -0.04        | -0.23                                          | <b>-1.87</b> | <b>-2.69</b> | <b>-1.99</b> | -1.32                           | <b>-2.10</b> | <b>-1.83</b> | <b>-2.26</b> |
| <i>IAA15</i> | -1.46                                   | 2.47  | 0.99  | -1.89 | -1.35                    | 1.98        | 1.26         | 0.64         | -0.88                                          | 0.95         | -0.42        | 1.56         | -0.99                           | 1.44         | -0.70        | -0.97        |
| <i>IAA16</i> | -0.39                                   | 0.01  | 0.17  | -0.03 | -0.52                    | -0.25       | -0.07        | 0.55         | 0.04                                           | -0.64        | 0.56         | <b>1.29</b>  | 0.18                            | -0.39        | 0.80         | 0.72         |
| <i>IAA17</i> | -0.47                                   | -1.06 | -0.36 | -0.42 | <b>1.85</b>              | 0.50        | 0.16         | -1.09        | 1.34                                           | 0.72         | -0.82        | <b>-3.34</b> | -0.97                           | -0.85        | -1.34        | <b>-2.66</b> |
| <i>IAA18</i> | 0.30                                    | 0.10  | 0.08  | -0.02 | -0.07                    | -0.50       | -0.53        | 0.25         | -0.14                                          | -0.58        | 0.03         | <b>1.39</b>  | 0.24                            | 0.02         | 0.64         | <b>1.12</b>  |
| <i>IAA19</i> | -1.40                                   | -1.51 | -0.75 | -0.92 | 0.14                     | 1.38        | <b>1.85</b>  | <b>1.65</b>  | 0.75                                           | <b>3.13</b>  | <b>1.77</b>  | -1.10        | -0.78                           | 0.25         | -0.83        | <b>-3.68</b> |
| <i>IAA26</i> | 0.02                                    | 0.12  | 0.04  | 0.03  | -0.07                    | 0.03        | -0.38        | -0.08        | 0.08                                           | -0.26        | 0.05         | 0.15         | 0.17                            | -0.17        | 0.47         | 0.26         |
| <i>IAA27</i> | 0.09                                    | -0.51 | 0.61  | 0.33  | -0.38                    | -0.52       | -1.52        | -1.50        | -0.73                                          | 0.21         | -1.74        | <b>-3.64</b> | -0.26                           | 0.23         | 0.39         | -1.81        |
| <i>IAA28</i> | -0.18                                   | 0.21  | 0.68  | 0.84  | -0.63                    | -0.11       | -0.32        | -0.37        | -0.29                                          | 0.54         | 0.28         | -0.24        | 0.15                            | 0.86         | <b>1.27</b>  | 0.97         |
| <i>IAA29</i> | <b>-2.66</b>                            | -1.26 | -0.71 | -1.62 | 0.29                     | 1.68        | 1.90         | 1.30         | 1.83                                           | 1.74         | -0.41        | <b>-3.94</b> | -1.12                           | -1.20        | <b>-3.03</b> | <b>-6.86</b> |
| <i>ARF5</i>  | 0.62                                    | 0.28  | 0.38  | 0.06  | -0.34                    | -0.52       | <b>-1.65</b> | -0.70        | -0.71                                          | -0.99        | -1.06        | 0.28         | 0.25                            | -0.18        | 0.97         | 1.04         |
| <i>ARF6</i>  | 0.21                                    | -0.13 | 0.21  | 0.05  | -0.28                    | -0.39       | <b>-0.68</b> | -0.25        | -0.04                                          | -0.54        | <b>-0.78</b> | -0.19        | 0.45                            | -0.28        | 0.10         | 0.11         |
| <i>ARF7</i>  | 0.08                                    | 0.33  | 0.19  | 0.33  | -0.17                    | 0.48        | <b>0.70</b>  | <b>0.61</b>  | 0.08                                           | <b>0.56</b>  | <b>0.88</b>  | <b>1.24</b>  | 0.33                            | 0.41         | 0.38         | <b>0.96</b>  |
| <i>ARF8</i>  | 0.27                                    | 0.12  | 0.35  | 0.13  | 0.00                     | -0.31       | -0.90        | -1.13        | 0.04                                           | -0.75        | <b>-1.87</b> | <b>-3.04</b> | 0.31                            | -0.31        | -0.61        | <b>-1.78</b> |
| <i>ARF1</i>  | 0.08                                    | 0.11  | -0.02 | -0.17 | <b>-0.49</b>             | -0.35       | <b>-0.50</b> | -0.43        | -0.45                                          | <b>-0.49</b> | -0.26        | -0.43        | 0.12                            | -0.03        | 0.22         | -0.17        |
| <i>ARF2</i>  | -0.16                                   | 0.12  | 0.00  | -0.03 | <b>-0.55</b>             | -0.09       | 0.28         | 0.29         | -0.43                                          | 0.00         | <b>0.78</b>  | 0.44         | -0.04                           | 0.22         | <b>0.50</b>  | 0.13         |
| <i>ARF3</i>  | -0.12                                   | -0.13 | 0.02  | -0.34 | -0.25                    | -0.62       | <b>-1.01</b> | <b>-1.33</b> | -0.16                                          | <b>-1.16</b> | <b>-2.22</b> | <b>-3.23</b> | -0.02                           | -0.66        | <b>-1.19</b> | <b>-2.24</b> |
| <i>ARF4</i>  | 0.25                                    | 0.27  | 0.41  | 0.32  | -0.46                    | -0.35       | <b>-0.82</b> | <b>-1.11</b> | -0.39                                          | -0.68        | <b>-1.90</b> | <b>-3.63</b> | 0.31                            | -0.06        | -0.67        | <b>-2.20</b> |
| <i>ARF9</i>  | -0.23                                   | 0.08  | 0.00  | -0.19 | -0.05                    | -0.13       | <b>-0.51</b> | -0.25        | 0.04                                           | <b>-0.77</b> | <b>-1.18</b> | <b>-0.92</b> | -0.14                           | <b>-0.55</b> | <b>-0.67</b> | <b>-0.85</b> |
| <i>ARF10</i> | 0.20                                    | 0.25  | 0.35  | 0.35  | 0.43                     | -0.43       | <b>-0.76</b> | -0.54        | 0.31                                           | <b>-0.84</b> | <b>-1.52</b> | <b>-1.71</b> | 0.07                            | -0.16        | -0.41        | <b>-0.83</b> |
| <i>ARF11</i> | -0.27                                   | -0.31 | -0.25 | -0.43 | -0.51                    | -0.34       | -0.34        | -0.25        | -0.41                                          | -0.49        | -0.12        | -0.18        | -0.18                           | -0.46        | -0.04        | -0.36        |
| <i>ARF12</i> | -0.02                                   | 0.98  | 1.93  | 0.89  | 0.09                     | 0.12        | 0.30         | 0.02         | -0.88                                          | -0.72        | -1.36        | -0.37        | -0.99                           | 0.14         | 0.26         | 0.51         |
| <i>ARF13</i> | -0.02                                   | -0.94 | 0.99  | -0.07 | -0.87                    | -0.84       | 0.30         | 0.02         | -0.88                                          | 0.24         | -0.42        | 0.60         | -0.03                           | 0.14         | 0.26         | 0.51         |
| <i>ARF14</i> | -0.02                                   | -0.94 | 1.88  | -0.07 | 0.09                     | -0.84       | 2.13         | 0.98         | 0.08                                           | 0.24         | -0.35        | 0.60         | -0.03                           | 0.14         | -0.60        | -0.45        |
| <i>ARF15</i> | -0.99                                   | 0.02  | 0.03  | -0.07 | -0.87                    | 0.12        | 0.30         | 0.02         | 0.08                                           | 1.20         | 1.50         | 1.56         | -0.03                           | 1.10         | 1.23         | 1.47         |
| <i>ARF16</i> | -0.02                                   | -0.15 | -0.04 | -0.19 | 0.06                     | -0.33       | -0.36        | <b>-0.81</b> | -0.21                                          | <b>-0.62</b> | <b>-0.92</b> | <b>-1.04</b> | -0.29                           | <b>-0.44</b> | <b>-0.60</b> | -0.42        |
| <i>ARF17</i> | -0.16                                   | -0.11 | -0.18 | -0.13 | 0.08                     | -0.05       | -0.30        | -0.06        | 0.20                                           | -0.43        | -0.41        | -0.55        | -0.04                           | -0.48        | -0.29        | <b>-0.62</b> |
| <i>ARF18</i> | 0.36                                    | 0.52  | 0.35  | 0.28  | -0.20                    | -0.09       | -0.10        | -0.41        | -0.09                                          | -0.21        | -0.11        | <b>-2.03</b> | 0.46                            | 0.41         | 0.33         | <b>-1.34</b> |
| <i>ARF20</i> | -0.02                                   | 0.02  | 0.99  | -0.07 | -0.87                    | -0.84       | 0.30         | 0.98         | -0.88                                          | -0.72        | -0.42        | 0.60         | -0.03                           | 0.14         | 0.26         | -0.45        |
| <i>ARF21</i> | -0.02                                   | -0.89 | 0.03  | -0.07 | 1.05                     | -1.75       | 0.30         | 1.85         | 0.08                                           | -0.72        | 2.39         | 0.60         | -0.99                           | 0.14         | 2.11         | -1.32        |
| <i>ARF22</i> | -0.99                                   | -1.46 | 1.89  | 1.77  | 0.09                     | -1.36       | 2.74         | 1.86         | 1.04                                           | 1.11         | -0.36        | 1.65         | -0.03                           | 1.01         | -1.22        | 1.56         |

**Supplemental Table S3.** Auxin concentrations (pmol g<sup>-1</sup> FW (mean ± SD)) corresponding to the plots depicted in Figure 3. tp, time point. PLP, prolonged light period.

| Condition             | tp | IAA         |              | oxIAA      |           | IAA-Asp      |              | IAA-Glu |  | IAA-Glc |  | oxIAA-Glc |  |
|-----------------------|----|-------------|--------------|------------|-----------|--------------|--------------|---------|--|---------|--|-----------|--|
| <i>Col-0</i> control  | 1  | 16.9 ± 1.6  | 217.8 ± 26.5 | 2.1 ± 0.6  | 1.9 ± 0.7 | 75.7 ± 28.3  | 639.7 ± 84.4 |         |  |         |  |           |  |
| <i>ahk2,3</i> control | 1  | 9.4 ± 0.7   | 118.2 ± 12.5 | 5.9 ± 0.6  | 2.9 ± 0.7 | 50.0 ± 10.6  | 356.5 ± 27.9 |         |  |         |  |           |  |
| <i>Col-0</i> PLP      | 1  | 21.3 ± 2.5  | 231.5 ± 26.7 | 3.3 ± 1.3  | 4.2 ± 1.5 | 121.9 ± 18.7 | 724.1 ± 72.7 |         |  |         |  |           |  |
| <i>ahk2,3</i> PLP     | 1  | 13.6 ± 0.9  | 114.7 ± 6.9  | 4.5 ± 1.1  | 3.2 ± 1.3 | 109.3 ± 18.5 | 353.3 ± 13.4 |         |  |         |  |           |  |
| <i>Col-0</i> control  | 2  | 18.7 ± 2.2  | 240.2 ± 20.1 | 1.7 ± 0.7  | 1.2 ± 0.3 | 56.0 ± 18.8  | 718.3 ± 68.4 |         |  |         |  |           |  |
| <i>ahk2,3</i> control | 2  | 7.1 ± 1.4   | 114.8 ± 14.4 | 4.3 ± 1.2  | 1.6 ± 0.7 | 45.8 ± 4.0   | 336.8 ± 50.3 |         |  |         |  |           |  |
| <i>Col-0</i> PLP      | 2  | 39.1 ± 10.5 | 284.3 ± 24.3 | 7.5 ± 2.9  | 1.4 ± 0.4 | 126.0 ± 27.7 | 859.4 ± 69.9 |         |  |         |  |           |  |
| <i>ahk2,3</i> PLP     | 2  | 33.2 ± 3.1  | 122.4 ± 11.9 | 6.6 ± 0.8  | 1.0 ± 0.3 | 101.7 ± 13.4 | 344.0 ± 41.4 |         |  |         |  |           |  |
| <i>Col-0</i> control  | 3  | 16.5 ± 1.3  | 240.3 ± 17.8 | 1.7 ± 0.7  | 0.6 ± 0.2 | 83.2 ± 9.5   | 720.2 ± 54.6 |         |  |         |  |           |  |
| <i>ahk2,3</i> control | 3  | 6.8 ± 0.7   | 110.7 ± 10.5 | 4.1 ± 0.5  | 1.3 ± 0.3 | 62.4 ± 16.2  | 326.3 ± 35.4 |         |  |         |  |           |  |
| <i>Col-0</i> PLP      | 3  | 17.7 ± 2.8  | 318.5 ± 29.9 | 9.4 ± 2.3  | 1.8 ± 0.7 | 151.5 ± 32.2 | 972.6 ± 59.6 |         |  |         |  |           |  |
| <i>ahk2,3</i> PLP     | 3  | 17.5 ± 2.1  | 189.6 ± 14.9 | 17.1 ± 2.4 | 1.1 ± 0.2 | 474.2 ± 94.9 | 562.1 ± 62.8 |         |  |         |  |           |  |

**Supplemental Table S4.** Sequences of primers used for qRT-PCR.

| Gene          | AGI number | Forward Primer                            | Reverse Primer              | Source                           |
|---------------|------------|-------------------------------------------|-----------------------------|----------------------------------|
| <i>BAP1</i>   | AT3G61190  | CCAGAGATTACGGCG<br>CGTGTT                 | TACAGACCCCAAACCG<br>GAACTCC | Nitschke <i>et al.</i> ,<br>2016 |
| <i>CAB2</i>   | AT1G29920  | AGAGGCCGAGGACTT<br>GCTTTAC                | GCCAATCTTCCGTTCT<br>TGAGC   | Nitschke <i>et al.</i> ,<br>2016 |
| <i>ZAT12</i>  | AT5G59820  | CGCTTTGTCGTCTGGAAGCAGCCCCACTCTCG<br>TTG   | TT                          | Nitschke <i>et al.</i> ,<br>2016 |
| <i>MCP2D</i>  | AT1G79340  | AACCCGCTATGCAGACCAGTTGGTTTCCCCGC<br>ACACG | TGGA                        | Nitschke <i>et al.</i> ,<br>2016 |
| <i>PP2AA2</i> | AT3G25800  | CCATTAGATCTTGTCT<br>CTCTGCT               | GACAAAACCCGTACCG<br>AG      | Nitschke <i>et al.</i> ,<br>2016 |
| <i>UBC10</i>  | AT5G53300  | CCATGGGCTAAATGGA<br>AA                    | TTCATTTGGTCCTGTC<br>TTCAG   | Nitschke <i>et al.</i> ,<br>2016 |
| <i>IAA1</i>   | AT4G14560  | CGGAGCTCCATATCTC<br>CGTAAG                | CATCACCGACCAACAT<br>CCAATC  | this work                        |
| <i>IAR3</i>   | AT1G51760  | TTCCGCAGCATACCAT<br>AGATCC                | CTTGCCTTGTGATAAC<br>CTGCTC  | this work                        |
| <i>TAR2</i>   | AT4G24670  | ATGCAGGGATACGGAT<br>TGGATG                | CCGTTACATTCCCACA<br>ACTGTC  | this work                        |
